# Supplementary material for: The Distribution of Fruit and Seed Toxicity during Development for Eleven Neotropical Trees and Vines in Central Panama
Source: PubMed Central journal article supplement (PMC3699617; doi:10.1371/journal.pone.0066764), 2013-07-02
Supplement: pone.0066764.s002.pdf [file pone.0066764.s002.pdf]

Table S2. Summary of generalized linear mixed models for *Artemia franciscana* survivorship in fruit extract and *Fusarium sp.* hyphal growth on fruit extract relative to negative controls for seven species.

| Bioassay                  | Variable                            | Estimate     | Std. Error  | z            |
|---------------------------|-------------------------------------|--------------|-------------|--------------|
| <b>A. <i>Artemia</i></b>  | Intercept                           | -0.10        | 1.18        | -0.09        |
|                           | Wind dispersal                      | 0.38         | 1.20        | 0.32         |
|                           | Seed                                | 0.41         | 0.36        | 0.12         |
|                           | Mature                              | -1.83        | 1.36        | -1.35        |
|                           | <b>Wind dispersal: Seed</b>         | <b>-0.98</b> | <b>0.34</b> | <b>-2.86</b> |
|                           | <b>Wind dispersal: Mature</b>       | <b>1.94</b>  | <b>0.45</b> | <b>4.34</b>  |
|                           | Seed: Mature                        | 0.44         | 0.38        | 1.16         |
|                           | <b>Wind dispersal: Seed: Mature</b> | <b>-1.54</b> | <b>0.38</b> | <b>-4.01</b> |
| <b>B. <i>Fusarium</i></b> | Intercept                           | 0.41         | 0.22        | 1.90         |
|                           | Wind dispersal                      | 0.11         | 0.30        | 0.38         |
|                           | Seed                                | 0.01         | 0.05        | 0.26         |
|                           | Mature                              | 0.17         | 0.12        | 1.43         |
|                           | <b>Wind dispersal: Seed</b>         | <b>0.39</b>  | <b>0.08</b> | <b>4.62</b>  |

*Notes:* The intercept is the mean of the immature pericarp from vertebrate-dispersed fruit and is the log of the odds ratio for *Artemia*. Coefficients of fixed effects are differences from the intercept. In bold are *P*-values significant at the 0.05 level.
