# Supplementary material for: The Distribution of Fruit and Seed Toxicity during Development for Eleven Neotropical Trees and Vines in Central Panama
Source: PubMed Central journal article supplement (PMC3699617; doi:10.1371/journal.pone.0066764), 2013-07-02
Supplement: pone.0066764.s004.pdf [file pone.0066764.s004.pdf]

Table S4. Summary of generalized linear mixed model for seed germination probability in response to natural removal treatment, fruit morphology, and activity of immature fruit against *Artemia franciscana* and *Fusarium sp.*

| <b>Variable</b>                                          | <b>Estimate</b> | <b>Std. Error</b> | <b>z</b>      |
|----------------------------------------------------------|-----------------|-------------------|---------------|
| Intercept                                                | -0.51           | 0.57              | -0.888        |
| Fungicide                                                | 0.17            | 0.29              | 0.611         |
| Insecticide                                              | 0.38            | 0.29              | 1.301         |
| Vertebrate exclosure                                     | 0.14            | 0.28              | 0.515         |
| PC1                                                      | -0.09           | 0.14              | -0.654        |
| <b>PC2</b>                                               | <b>-0.76</b>    | <b>0.25</b>       | <b>-3.035</b> |
| <b>PC3</b>                                               | <b>0.55</b>     | <b>0.22</b>       | <b>2.541</b>  |
| <b>Activity of immature fruit against <i>Artemia</i></b> | <b>-0.50</b>    | <b>0.19</b>       | <b>-2.583</b> |
| <b>Fungicide: PC1</b>                                    | <b>0.35</b>     | <b>0.15</b>       | <b>2.282</b>  |
| Insecticide: PC1                                         | 0.08            | 0.16              | 0.482         |
| Vertebrate Exclosure: PC1                                | 0.20            | 0.15              | 1.316         |
| Fungicide: PC2                                           | 0.07            | 0.22              | 0.298         |
| Insecticide: PC2                                         | 0.23            | 0.21              | 1.098         |
| Vertebrate Exclosure: PC2                                | 0.34            | 0.21              | 1.613         |
| Fungicide: PC3                                           | -0.21           | 0.23              | -0.919        |
| Insecticide: PC3                                         | -0.21           | 0.23              | -0.892        |
| Vertebrate Exclosure: PC3                                | -0.14           | 0.22              | -0.633        |

Notes: Interpretation as for Table S3; in bold are *P*-values significant at the 0.05 level.
