# Supplementary material for: The Distribution of Fruit and Seed Toxicity during Development for Eleven Neotropical Trees and Vines in Central Panama
Source: PLOS journal article supplement (doi:10.1371/journal.pone.0066764), 2013-07-02
Supplement: S1 (10.1371/journal.pone.0066764.s001) [file journal.pone.0066764.s001]

Table S1. Summary of generalized linear mixed models for *Artemia franciscana* survivorship in fruit extract and *Fusarium sp.* hyphal growth on fruit extract relative to negative controls for mature fruit of eleven species.

| Bioassay                  | Variable                    | Estimate     | Std. Error  | z             |
|---------------------------|-----------------------------|--------------|-------------|---------------|
| <b>A. <i>Artemia</i></b>  | Intercept                   | -1.57        | 1.27        | -1.24         |
|                           | <b>Wind dispersal</b>       | <b>3.74</b>  | <b>1.12</b> | <b>3.33</b>   |
|                           | <b>Seed</b>                 | <b>1.55</b>  | <b>0.12</b> | <b>13.24</b>  |
|                           | <b>Wind dispersal: Seed</b> | <b>-2.88</b> | <b>0.16</b> | <b>-17.62</b> |
| <b>B. <i>Fusarium</i></b> | <b>Intercept</b>            | <b>0.79</b>  | <b>0.16</b> | <b>5.03</b>   |
|                           | Wind dispersal              | 0.01         | 0.22        | 0.05          |
|                           | <b>Seed</b>                 | <b>0.12</b>  | <b>0.04</b> | <b>3.15</b>   |
|                           | Wind dispersal: Seed        | -0.13        | 0.09        | -1.48         |

Notes: The intercept is the mean of the mature pericarp from vertebrate-dispersed fruit and is the log of the odds ratio for *Artemia*. Coefficients of fixed effects are differences from the intercept. In bold are *P*-values significant at the 0.05 level.
